# Supplementary material
Source: MDPI journal article supplement (https://www.mdpi.com/2073-4352/11/8/896)
Supplement: s1 [file s1]

# Intramolecular Hydrogen Bond, Hirshfeld Analysis, AIM; DFT Studies of Pyran-2,4-dione Derivatives

Ahmed T. A. Boraei <sup>1,\*</sup>, Matti Haukka <sup>2</sup>, Ahmed A.M. Sarhan <sup>3</sup>, Saied M. Soliman <sup>4</sup> and Assem Barakat <sup>5,\*</sup>

<sup>1</sup> Chemistry Department, Faculty of Science, Suez Canal University, Ismailia 41522, Egypt

<sup>2</sup> Department of Chemistry, University of Jyväskylä, P.O. Box 35, FI-40014 Jyväskylä, Finland; matti.o.haukka@jyu.fi

<sup>3</sup> Chemistry Department, Faculty of Science, Arish University, Al-Arish 45511, Egypt; asarhan@aru.edu.eg

<sup>4</sup> Department of Chemistry, Faculty of Science, Alexandria University, P.O. Box 426, Ibrahimia, Alexandria 21321, Egypt; saeed.soliman@alexu.edu.eg

<sup>5</sup> Department of Chemistry, College of Science, King Saud University, P. O. Box 2455, Riyadh 11451, Saudi Arabia

\* Correspondence: ahmed\_boraei@science.suez.edu.eg (A.T.A.B.); ambarakat@ksu.edu.sa (A.B.); Tel.: +966-11467-5901 (A.T.A.B.); +966-11467-5992 (A.B.)

## X-Ray single crystal determination of 1

The crystal of **1** was immersed in cryo-oil, mounted in a loop, and measured at a temperature of 120 K. The X-ray diffraction data was collected on a Rigaku Oxford Diffraction Supernova diffractometer using Cu K $\alpha$  radiation. The *CrysAlisPro* [1] software package was used for cell refinement and data reduction. A multi-scan absorption correction (*CrysAlisPro* [2]) was applied to the intensities before structure solution. The structure was solved by intrinsic phasing (*SHELXT*) method. Structural refinement was carried out using *SHELXL* [3] software with *SHELXLE* [4] graphical user interface. The NH hydrogen atom was located from the difference Fourier map and refined isotropically. All other hydrogen atoms were positioned geometrically and constrained to ride on their parent atoms, with C-H = 0.95 Å and U<sub>iso</sub> = 1.2·U<sub>eq</sub> (parent atom). The topology analyses of molecular packing were performed using Crystal Explorer 17.5 program [5].

## References

1. Rigaku Oxford Diffraction, *CrysAlisPro*, Agilent Technologies inc., **2018**, Yarnton, Oxfordshire, England.
2. Sheldrick, G.M. *Acta Cryst.* **2015**, C71, 3-8.
3. Hübschle, C. B.; Sheldrick, G.M.; Dittrich, B. J. *Appl. Cryst.* **2011**, 44, 1281-1284.
4. Sheldrick, G. M. SADABS - Bruker Nonius scaling and absorption correction -, Bruker AXS, Inc.: Madison, Wisconsin, USA, 2012.

5. Turner, M. J.; McKinnon, J. J.; Wolff, S. K.; Grimwood, D. J.; Spackman, P. R.; Jayatilaka, D.; Spackman, M. A. Crystal Explorer17 (2017) University of Western Australia. <http://hirshfeldsurface.net>

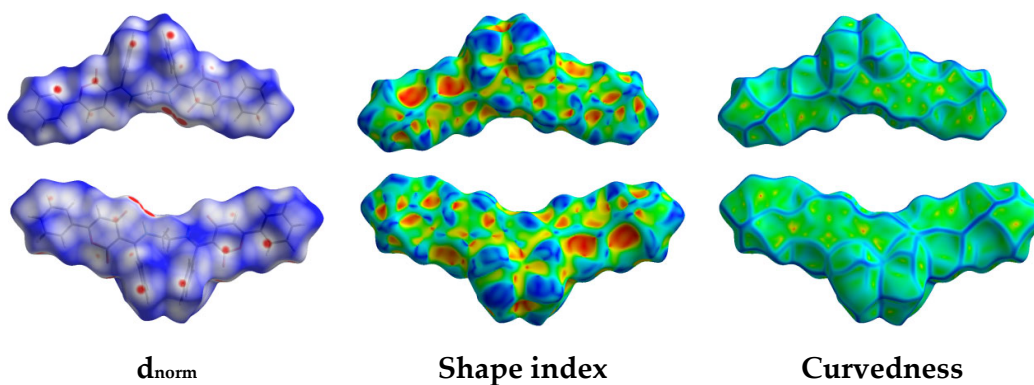

Fig. S1 Hirshfeld surfaces of 1.

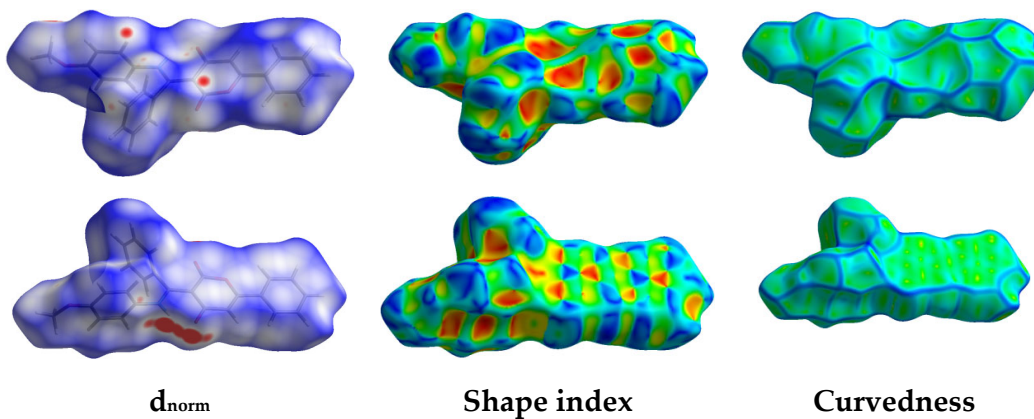

Fig. S2 Hirshfeld surfaces of 2.

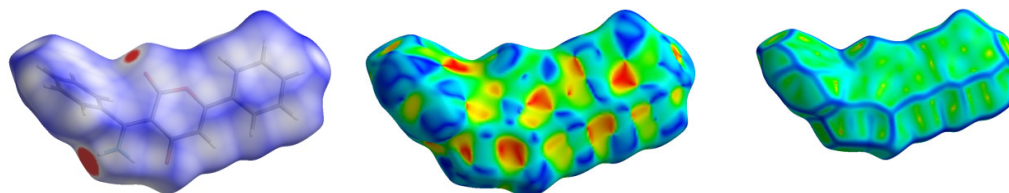

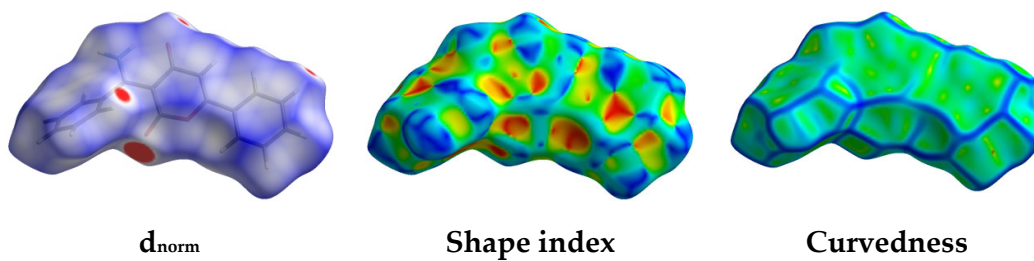

Fig. S3 Hirshfeld surfaces of 3.

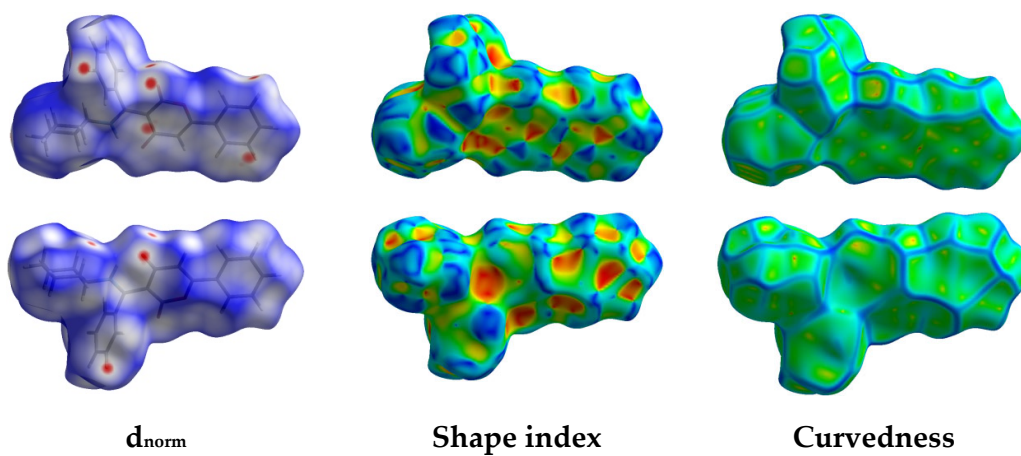

Fig. S4 Hirshfeld surfaces of 4.

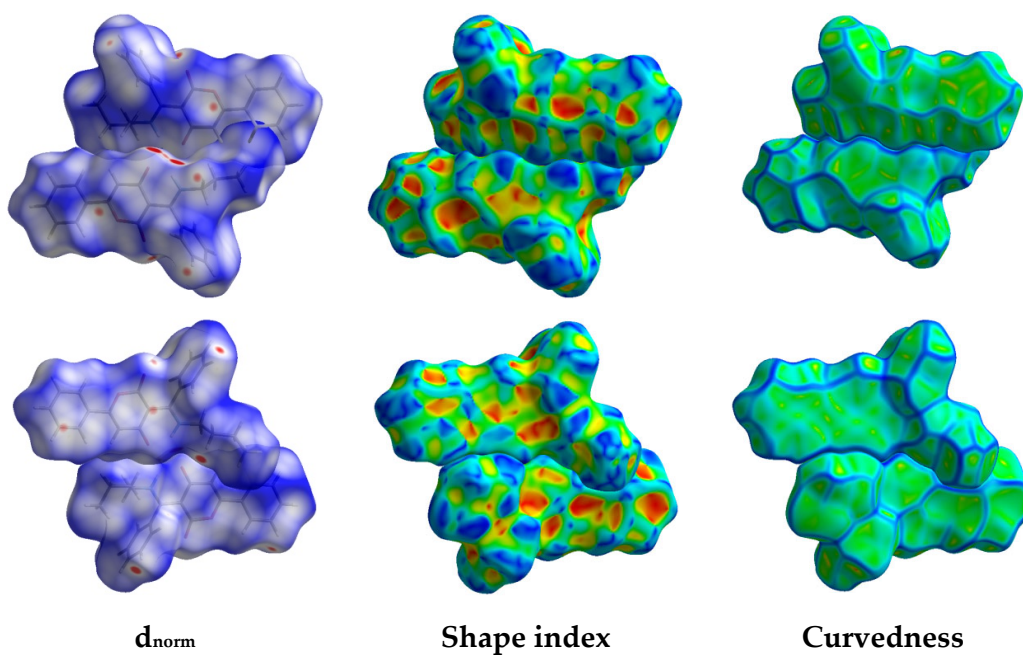

Fig. S5 Hirshfeld surfaces of 5.

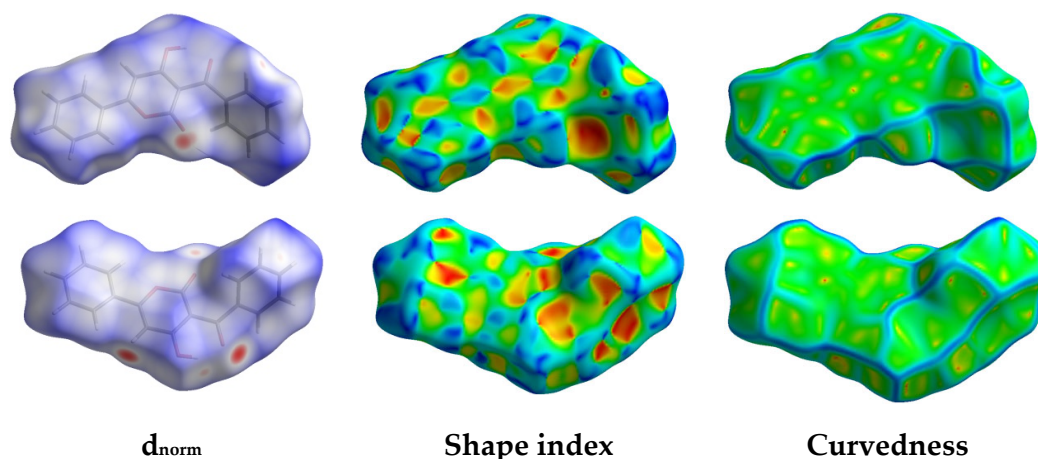

**Fig. S6** Hirshfeld surfaces for one molecular unit of **6**.

**Table S1** Crystal data and structure refinement for **1**.

| Contact                                    | <b>1</b>                                                      |
|--------------------------------------------|---------------------------------------------------------------|
| empirical formula                          | C <sub>38</sub> H <sub>28</sub> N <sub>2</sub> O <sub>6</sub> |
| fw                                         | 608.62                                                        |
| temp (K)                                   | 120(2)                                                        |
| $\lambda$ (Å)                              | 0.71073                                                       |
| cryst syst                                 | Monoclinic                                                    |
| space group                                | C2/c                                                          |
| <i>a</i> (Å)                               | 14.0869(4)                                                    |
| <i>b</i> (Å)                               | 20.9041(5)                                                    |
| <i>c</i> (Å)                               | 10.1444(2)                                                    |
| $\beta$ (deg)                              | 99.687(2)                                                     |
| <i>V</i> (Å <sup>3</sup> )                 | 2944.67(12)                                                   |
| <i>Z</i>                                   | 4                                                             |
| $\rho_{\text{calc}}$ (Mg/m <sup>3</sup> )  | 1.373                                                         |
| $\mu$ (Mo K $\alpha$ ) (mm <sup>-1</sup> ) | 0.094                                                         |
| No. reflns.                                | 12328                                                         |
| Unique reflns.                             | 3657                                                          |
| GOOF (F <sup>2</sup> )                     | 1.040                                                         |
| R <sub>int</sub>                           | 0.0204                                                        |
| R1 <sup>a</sup> ( <i>I</i> ≥ 2 $\sigma$ )  | 0.0453                                                        |
| wR2 <sup>b</sup> ( <i>I</i> ≥ 2 $\sigma$ ) | 0.1136                                                        |
| CCDC No.                                   | 2068753                                                       |

**Table S2** Bond lengths (Å) and angles (°) for **1**.

| <b>Bond</b>                           | <b>Length/Å</b> | <b>Bond</b>             | <b>Length/Å</b> |
|---------------------------------------|-----------------|-------------------------|-----------------|
| O1-C9                                 | 1.2524(18)      | C7-C8                   | 1.329(2)        |
| O2-C11                                | 1.2079(19)      | C8-C9                   | 1.444(2)        |
| O3-C7                                 | 1.3573(19)      | C9-C10                  | 1.439(2)        |
| O3-C11                                | 1.4069(17)      | C10-C12                 | 1.4290(19)      |
| N1-C12                                | 1.3239(18)      | C10-C11                 | 1.445(2)        |
| N1-C19                                | 1.4668(17)      | C12-C13                 | 1.489(2)        |
| C1-C6                                 | 1.391(2)        | C13-C18                 | 1.389(2)        |
| C1-C2                                 | 1.393(2)        | C13-C14                 | 1.391(2)        |
| C2-C3                                 | 1.380(3)        | C14-C15                 | 1.383(2)        |
| C3-C4                                 | 1.370(3)        | C15-C16                 | 1.372(2)        |
| C4-C5                                 | 1.389(2)        | C16-C17                 | 1.376(2)        |
| C5-C6                                 | 1.393(2)        | C17-C18                 | 1.389(2)        |
| C6-C7                                 | 1.478(2)        | C19-C19 <sup>1</sup>    | 1.531(3)        |
| <b>Bonds</b>                          | <b>Angle/°</b>  | <b>Bonds</b>            | <b>Angle/°</b>  |
| C7-O3-C11                             | 123.04(12)      | C12-C10-C11             | 119.08(14)      |
| C12-N1-C19                            | 126.22(14)      | C9-C10-C11              | 119.73(13)      |
| C6-C1-C2                              | 120.32(16)      | O2-C11-O3               | 114.04(13)      |
| C3-C2-C1                              | 119.97(18)      | O2-C11-C10              | 128.89(14)      |
| C4-C3-C2                              | 120.13(16)      | O3-C11-C10              | 117.05(14)      |
| C3-C4-C5                              | 120.48(16)      | N1-C12-C10              | 119.86(14)      |
| C4-C5-C6                              | 120.19(16)      | N1-C12-C13              | 117.53(12)      |
| C1-C6-C5                              | 118.87(14)      | C10-C12-C13             | 122.60(12)      |
| C1-C6-C7                              | 120.87(14)      | C18-C13-C14             | 119.27(15)      |
| C5-C6-C7                              | 120.24(15)      | C18-C13-C12             | 120.87(13)      |
| C8-C7-O3                              | 121.01(14)      | C14-C13-C12             | 119.85(13)      |
| C8-C7-C6                              | 126.35(15)      | C15-C14-C13             | 120.31(15)      |
| O3-C7-C6                              | 112.61(13)      | C16-C15-C14             | 120.21(16)      |
| C7-C8-C9                              | 122.15(16)      | C15-C16-C17             | 119.99(16)      |
| O1-C9-C10                             | 123.21(13)      | C16-C17-C18             | 120.57(15)      |
| O1-C9-C8                              | 119.85(15)      | C17-C18-C13             | 119.64(15)      |
| C10-C9-C8                             | 116.94(13)      | N1-C19-C19 <sup>1</sup> | 111.66(15)      |
| C12-C10-C9                            | 121.19(13)      |                         |                 |
| Symm. Code. <sup>1</sup> 1-X,+Y,5/2-Z |                 |                         |                 |

**Table S3** The calculated geometric parameters of **1<sup>a</sup>**.

| <b>parameter</b> | <b>Calc</b> | <b>Exp</b> |
|------------------|-------------|------------|
| R(1-18)          | 1.359       | 1.37       |
| R(1-19)          | 1.412       | 1.403      |
| R(2-19)          | 1.209       | 1.208      |
| R(3-6)           | 1.608       | 1.663      |
| R(3-21)          | 1.258       | 1.259      |
| R(4-41)          | 1.363       | 1.373      |
| R(4-42)          | 1.42        | 1.441      |
| R(5-24)          | 1.34        | 1.33       |
| R(5-36)          | 1.419       | 1.433      |
| R(7-9)           | 1.391       | 1.379      |
| R(7-17)          | 1.406       | 1.397      |
| R(9-11)          | 1.397       | 1.387      |
| R(11-13)         | 1.395       | 1.382      |
| R(13-15)         | 1.393       | 1.376      |
| R(15-17)         | 1.405       | 1.394      |
| R(17-18)         | 1.475       | 1.464      |
| R(18-22)         | 1.354       | 1.341      |
| R(19-20)         | 1.457       | 1.438      |
| R(20-21)         | 1.463       | 1.449      |
| R(20-24)         | 1.42        | 1.418      |
| R(21-22)         | 1.448       | 1.431      |
| R(24-25)         | 1.493       | 1.493      |
| R(25-26)         | 1.401       | 1.37       |
| R(25-34)         | 1.399       | 1.361      |
| R(26-28)         | 1.392       | 1.384      |
| R(28-30)         | 1.397       | 1.365      |
| R(30-32)         | 1.395       | 1.361      |
| R(32-34)         | 1.395       | 1.384      |
| R(36-37)         | 1.398       | 1.371      |
| R(36-48)         | 1.405       | 1.366      |
| R(37-39)         | 1.396       | 1.39       |
| R(39-41)         | 1.4         | 1.376      |
| R(41-46)         | 1.403       | 1.376      |
| R(46-48)         | 1.386       | 1.385      |
| R(35-37)         | 1.397       | 1.381      |

|             |       |       |
|-------------|-------|-------|
| R(37-39)    | 1.392 | 1.383 |
| R(41-42)    | 1.555 | 1.549 |
| R(43-46)    | 1.519 | 1.496 |
| R(50-51)    | 1.404 | 1.382 |
| R(50-59)    | 1.406 | 1.392 |
| R(51-53)    | 1.396 | 1.39  |
| R(53-55)    | 1.393 | 1.379 |
| R(55-57)    | 1.397 | 1.381 |
| R(57-59)    | 1.391 | 1.387 |
| R(61-62)    | 1.477 | 1.478 |
| R(63-66)    | 1.52  | 1.512 |
| A(18-1-19)  | 123.8 | 122.8 |
| A(1-18-17)  | 112.5 | 112.4 |
| A(1-18-22)  | 121.2 | 120.8 |
| A(1-19-2)   | 114.8 | 113.9 |
| A(1-19-20)  | 116.3 | 117.8 |
| A(2-19-20)  | 128.9 | 128.3 |
| A(6-3-21)   | 101.1 | 104.2 |
| A(3-6-5)    | 145.6 | 139.1 |
| A(3-21-20)  | 123.2 | 122.2 |
| A(3-21-22)  | 119.7 | 119.7 |
| A(41-4-42)  | 118.3 | 116.5 |
| A(4-41-39)  | 124.8 | 124.7 |
| A(4-41-46)  | 115.8 | 116   |
| A(4-42-43)  | 111.6 | 109.5 |
| A(4-42-44)  | 106   | 109.5 |
| A(4-42-45)  | 111.6 | 109.4 |
| A(24-5-36)  | 131.4 | 125.9 |
| A(5-24-20)  | 118   | 119.6 |
| A(5-24-25)  | 118.7 | 115.6 |
| A(24-5-6)   | 110.8 | 113.8 |
| A(5-36-37)  | 124.3 | 120   |
| A(5-36-48)  | 116.7 | 120.6 |
| A(36-5-6)   | 117.5 | 120.3 |
| A(8-7-9)    | 119.4 | 119.7 |
| A(8-7-17)   | 120   | 119.8 |
| A(9-7-17)   | 120.5 | 120.6 |
| A(7-9-10)   | 119.6 | 119.6 |
| A(7-9-11)   | 120.2 | 120.9 |
| A(7-17-15)  | 118.9 | 117.8 |
| A(7-17-18)  | 121.1 | 120.8 |
| A(10-9-11)  | 120.1 | 119.6 |
| A(9-11-12)  | 120.1 | 120.5 |
| A(9-11-13)  | 119.7 | 118.9 |
| A(12-11-13) | 120.2 | 120.6 |
| A(11-13-14) | 120.1 | 119.8 |

|             |       |       |
|-------------|-------|-------|
| A(11-13-15) | 120.3 | 120.4 |
| A(14-13-15) | 119.6 | 119.8 |
| A(13-15-16) | 120.5 | 119.3 |
| A(13-15-17) | 120.4 | 121.4 |
| A(16-15-17) | 119.2 | 119.3 |
| A(15-17-18) | 120.1 | 121.4 |
| A(17-18-22) | 126.3 | 126.8 |
| A(18-22-21) | 121.3 | 121.7 |
| A(18-22-23) | 121.7 | 119.1 |
| A(19-20-21) | 119.5 | 118.9 |
| A(19-20-24) | 120   | 120.1 |
| A(21-20-24) | 120.5 | 120.9 |
| A(20-21-22) | 117.1 | 118   |
| A(20-24-25) | 123.3 | 124.8 |
| A(21-22-23) | 117   | 119.2 |
| A(24-25-26) | 120.6 | 119.1 |
| A(24-25-34) | 119.8 | 122.1 |
| A(26-25-34) | 119.6 | 118.6 |
| A(25-26-27) | 119.6 | 119.8 |
| A(25-26-28) | 120.1 | 120.4 |
| A(25-34-32) | 120.1 | 120.9 |
| A(25-34-35) | 119.7 | 119.6 |
| A(27-26-28) | 120.2 | 119.8 |
| A(26-28-29) | 119.7 | 119.7 |
| A(26-28-30) | 120.2 | 120.7 |
| A(29-28-30) | 120.1 | 119.6 |
| A(28-30-31) | 120.1 | 120.6 |
| A(28-30-32) | 119.8 | 118.8 |
| A(31-30-32) | 120.1 | 120.6 |
| A(30-32-33) | 120.2 | 119.7 |
| A(30-32-34) | 120.2 | 120.5 |
| A(33-32-34) | 119.7 | 119.7 |
| A(32-34-35) | 120.1 | 119.5 |
| A(37-36-48) | 118.9 | 119.2 |
| A(36-37-38) | 120.3 | 119.6 |
| A(36-37-39) | 120.6 | 120.8 |
| A(36-48-46) | 120.8 | 120.6 |
| A(36-48-49) | 119.3 | 119.7 |
| A(38-37-39) | 119.2 | 119.5 |
| A(37-39-40) | 118.8 | 120.2 |
| A(37-39-41) | 120.2 | 119.7 |
| A(40-39-41) | 121   | 120.2 |
| A(39-41-46) | 119.4 | 119.3 |
| A(41-46-47) | 118.7 | 119.9 |
| A(41-46-48) | 120.2 | 120.3 |
| A(43-42-44) | 109.2 | 109.5 |



|             |       |       |
|-------------|-------|-------|
| A(43-42-45) | 109.1 | 109.5 |
| A(44-42-45) | 109.2 | 109.5 |
| A(47-46-48) | 121.1 | 119.9 |
| A(46-48-49) | 119.9 | 119.7 |

<sup>a</sup>Atom numbering refer to **Fig. 9**

**Table S4** The calculated geometric parameters of **2<sup>a</sup>**.

| Parameter  | Calc  | Exp   |
|------------|-------|-------|
| R(1-19)    | 1.254 | 1.263 |
| R(1-35)    | 1.694 | 1.729 |
| R(2-21)    | 1.21  | 1.217 |
| R(3-22)    | 1.335 | 1.318 |
| R(4-16)    | 1.36  | 1.367 |
| R(4-21)    | 1.409 | 1.391 |
| R(5-7)     | 1.393 | 1.379 |
| R(5-15)    | 1.405 | 1.395 |
| R(7-9)     | 1.395 | 1.381 |
| R(9-11)    | 1.397 | 1.386 |
| R(11-13)   | 1.391 | 1.391 |
| R(13-15)   | 1.406 | 1.397 |
| R(15-16)   | 1.475 | 1.471 |
| R(16-17)   | 1.353 | 1.321 |
| R(17-19)   | 1.45  | 1.445 |
| R(19-20)   | 1.467 | 1.45  |
| R(20-21)   | 1.456 | 1.439 |
| R(20-22)   | 1.412 | 1.424 |
| R(22-23)   | 1.491 | 1.49  |
| R(23-24)   | 1.402 | 1.394 |
| R(23-32)   | 1.402 | 1.394 |
| R(24-26)   | 1.395 | 1.385 |
| R(26-28)   | 1.394 | 1.383 |
| R(28-30)   | 1.398 | 1.393 |
| R(30-32)   | 1.391 | 1.388 |
| A(19-1-35) | 103.4 | 101.4 |
| A(1-19-17) | 119.8 | 119.1 |
| A(1-19-20) | 123.5 | 123.6 |
| A(1-35-3)  | 137.9 | 139.9 |
| A(2-21-4)  | 114.9 | 114.4 |
| A(2-21-20) | 128.7 | 127.8 |
| A(22-3-34) | 119.4 | 122.5 |
| A(22-3-35) | 115.6 | 115.5 |

|             |       |       |
|-------------|-------|-------|
| A(3-22-20)  | 119.4 | 119.1 |
| A(3-22-23)  | 114.5 | 114.3 |
| A(34-3-35)  | 123.8 | 121.7 |
| A(16-4-21)  | 123.8 | 123.2 |
| A(4-16-15)  | 112.4 | 112.6 |
| A(4-16-17)  | 121.3 | 120.9 |
| A(4-21-20)  | 116.4 | 117.8 |
| A(6-5-7)    | 120.4 | 119.8 |
| A(6-5-15)   | 119.2 | 119.8 |
| A(7-5-15)   | 120.4 | 120.4 |
| A(5-7-8)    | 119.6 | 119.7 |
| A(5-7-9)    | 120.3 | 120.6 |
| A(5-15-13)  | 118.8 | 118.7 |
| A(5-15-16)  | 120.1 | 120.9 |
| A(8-7-9)    | 120.1 | 119.7 |
| A(7-9-10)   | 120.2 | 120   |
| A(7-9-11)   | 119.7 | 120   |
| A(10-9-11)  | 120.1 | 120   |
| A(9-11-12)  | 120.1 | 120.2 |
| A(9-11-13)  | 120.2 | 119.6 |
| A(12-11-13) | 119.6 | 120.2 |
| A(11-13-14) | 119.4 | 119.6 |
| A(11-13-15) | 120.5 | 120.8 |
| A(14-13-15) | 120.1 | 119.6 |
| A(13-15-16) | 121.1 | 120.4 |
| A(15-16-17) | 126.3 | 126.6 |
| A(16-17-18) | 121.6 | 119   |
| A(16-17-19) | 121.5 | 121.9 |
| A(18-17-19) | 116.9 | 119.1 |
| A(17-19-20) | 116.6 | 117.3 |
| A(19-20-21) | 119.9 | 118.8 |
| A(19-20-22) | 119.8 | 120.1 |
| A(21-20-22) | 120.2 | 121.1 |
| A(20-22-23) | 126   | 126.6 |
| A(22-23-24) | 119.2 | 119.3 |
| A(22-23-32) | 121.2 | 121   |
| A(24-23-32) | 119.4 | 119.4 |
| A(23-24-25) | 119.6 | 119.9 |
| A(23-24-26) | 120.3 | 120.2 |
| A(23-32-30) | 120.1 | 120.2 |
| A(23-32-33) | 119.7 | 119.9 |
| A(25-24-26) | 120.1 | 119.9 |
| A(24-26-27) | 119.7 | 119.9 |
| A(24-26-28) | 120   | 120.2 |
| A(27-26-28) | 120.3 | 119.9 |
| A(26-28-29) | 120.1 | 119.9 |

|             |       |       |
|-------------|-------|-------|
| A(26-28-30) | 119.9 | 120.1 |
| A(29-28-30) | 120   | 120   |
| A(28-30-31) | 120.1 | 120.1 |
| A(28-30-32) | 120.3 | 119.9 |
| A(31-30-32) | 119.6 | 120.1 |
| A(30-32-33) | 120.2 | 119.9 |
| A(28-30-32) | 120.3 | 118.8 |
| A(31-30-32) | 119.6 | 120.6 |
| A(30-32-33) | 120.2 | 119.7 |

<sup>a</sup>Atom numbering refer to **Fig. 9**

**Table S5** The calculated geometric parameters of **3<sup>a</sup>**.

| Parameter | Calc  | Exp   |
|-----------|-------|-------|
| R(1-17)   | 1.359 | 1.364 |
| R(1-22)   | 1.412 | 1.406 |
| R(2-22)   | 1.21  | 1.207 |
| R(3-5)    | 1.653 | 1.787 |
| R(3-20)   | 1.257 | 1.25  |
| R(4-23)   | 1.331 | 1.315 |
| R(4-35)   | 1.462 | 1.472 |
| R(6-8)    | 1.391 | 1.389 |
| R(6-16)   | 1.406 | 1.394 |
| R(8-10)   | 1.397 | 1.383 |
| R(10-12)  | 1.395 | 1.383 |
| R(12-14)  | 1.393 | 1.386 |
| R(14-16)  | 1.405 | 1.394 |
| R(16-17)  | 1.476 | 1.479 |
| R(17-18)  | 1.354 | 1.331 |
| R(18-20)  | 1.45  | 1.447 |
| R(20-21)  | 1.461 | 1.446 |
| R(21-22)  | 1.454 | 1.44  |
| R(21-23)  | 1.42  | 1.423 |
| R(23-24)  | 1.499 | 1.496 |
| R(24-25)  | 1.4   | 1.387 |
| R(24-33)  | 1.399 | 1.389 |
| R(25-27)  | 1.394 | 1.389 |
| R(27-29)  | 1.396 | 1.381 |
| R(29-31)  | 1.396 | 1.382 |
| R(31-33)  | 1.394 | 1.386 |
| R(35-37)  | 1.541 | 1.521 |
| R(35-49)  | 1.54  | 1.52  |
| R(37-40)  | 1.536 | 1.523 |
| R(40-43)  | 1.535 | 1.512 |
| R(43-46)  | 1.535 | 1.515 |
| R(46-49)  | 1.536 | 1.531 |

|             |       |       |
|-------------|-------|-------|
| A(17-1-22)  | 123.9 | 122.7 |
| A(1-17-16)  | 112.4 | 111.8 |
| A(1-17-18)  | 121.2 | 121.4 |
| A(1-22-2)   | 114.8 | 114.4 |
| A(1-22-21)  | 116.4 | 116.8 |
| A(2-22-21)  | 128.8 | 128.9 |
| A(5-3-20)   | 101.8 | 100.4 |
| A(3-5-4)    | 143.3 | 141.3 |
| A(3-20-18)  | 119.7 | 120.2 |
| A(3-20-21)  | 123.4 | 123.6 |
| A(5-4-23)   | 111.9 | 114.2 |
| A(5-4-35)   | 119.4 | 118.6 |
| A(23-4-35)  | 128.7 | 127   |
| A(4-23-21)  | 119.3 | 119.9 |
| A(4-23-24)  | 117.5 | 117.3 |
| A(4-35-36)  | 108   | 108.7 |
| A(4-35-37)  | 110   | 110.5 |
| A(4-35-49)  | 109.9 | 108.7 |
| A(7-6-8)    | 119.3 | 119.9 |
| A(7-6-16)   | 120.1 | 120   |
| A(8-6-16)   | 120.6 | 120.1 |
| A(6-8-9)    | 119.6 | 119.9 |
| A(6-8-10)   | 120.3 | 120.3 |
| A(6-16-14)  | 118.8 | 119.1 |
| A(6-16-17)  | 121.2 | 120.2 |
| A(9-8-10)   | 120.1 | 119.9 |
| A(8-10-11)  | 120.1 | 120   |
| A(8-10-12)  | 119.6 | 120.1 |
| A(11-10-12) | 120.2 | 120   |
| A(10-12-13) | 120.1 | 120   |
| A(10-12-14) | 120.3 | 120   |
| A(13-12-14) | 119.5 | 120   |
| A(12-14-15) | 120.4 | 119.7 |
| A(12-14-16) | 120.4 | 120.5 |
| A(15-14-16) | 119.1 | 119.7 |
| A(14-16-17) | 120   | 120.7 |
| A(16-17-18) | 126.3 | 126.8 |
| A(17-18-19) | 121.7 | 119   |
| A(17-18-20) | 121.4 | 122.1 |
| A(19-18-20) | 116.8 | 119   |
| A(18-20-21) | 116.9 | 116.2 |
| A(20-21-22) | 120.1 | 120.3 |
| A(20-21-23) | 120.3 | 120.3 |
| A(22-21-23) | 119.6 | 119.3 |
| A(21-23-24) | 123.2 | 122.7 |
| A(23-24-25) | 120.2 | 119   |

|             |       |       |
|-------------|-------|-------|
| A(23-24-33) | 120.1 | 120.8 |
| A(25-24-33) | 119.6 | 120.1 |
| A(24-25-26) | 119.7 | 120.1 |
| A(24-25-27) | 120.1 | 119.8 |
| A(24-33-31) | 120.1 | 119.9 |
| A(24-33-34) | 119.7 | 120   |
| A(26-25-27) | 120.2 | 120.1 |
| A(25-27-28) | 119.7 | 120.1 |
| A(25-27-29) | 120.2 | 119.8 |
| A(28-27-29) | 120.1 | 120.1 |
| A(27-29-30) | 120.1 | 119.7 |
| A(27-29-31) | 119.8 | 120.6 |
| A(30-29-31) | 120.1 | 119.7 |
| A(29-31-32) | 120.1 | 120.1 |
| A(29-31-33) | 120.2 | 119.8 |
| A(32-31-33) | 119.7 | 120.1 |
| A(31-33-34) | 120.2 | 120   |
| A(36-35-37) | 108.8 | 108.7 |
| A(36-35-49) | 108.8 | 108.7 |
| A(37-35-49) | 111.2 | 111.6 |
| A(35-37-38) | 109.3 | 109.5 |
| A(35-37-39) | 108.8 | 109.5 |
| A(35-37-40) | 111.5 | 110.8 |
| A(35-49-46) | 111.5 | 110.6 |
| A(35-49-50) | 108.8 | 109.5 |
| A(35-49-51) | 109.3 | 109.5 |
| A(38-37-39) | 106.7 | 108.1 |
| A(38-37-40) | 110.7 | 109.5 |
| A(39-37-40) | 109.7 | 109.5 |
| A(37-40-41) | 109.6 | 109.5 |
| A(37-40-42) | 109.2 | 109.5 |
| A(37-40-43) | 111.6 | 110.9 |
| A(41-40-42) | 106.4 | 108.1 |
| A(41-40-43) | 110.5 | 109.5 |
| A(42-40-43) | 109.3 | 109.5 |
| A(40-43-44) | 110.2 | 109.3 |
| A(40-43-45) | 109.3 | 109.3 |
| A(40-43-46) | 111.2 | 111.4 |
| A(44-43-45) | 106.5 | 108   |
| A(44-43-46) | 110.2 | 109.4 |
| A(45-43-46) | 109.3 | 109.4 |
| A(43-46-47) | 109.3 | 109.4 |
| A(43-46-48) | 110.5 | 109.3 |
| A(43-46-49) | 111.6 | 111.5 |
| A(47-46-48) | 106.4 | 108   |
| A(47-46-49) | 109.3 | 109.3 |

|             |       |       |
|-------------|-------|-------|
| A(48-46-49) | 109.6 | 109.3 |
| A(46-49-50) | 109.6 | 109.5 |
| A(46-49-51) | 110.7 | 109.5 |
| A(50-49-51) | 106.7 | 108.1 |

<sup>a</sup>Atom numbering refer to **Fig. 9**

**Table S6** The calculated geometric parameters of **4<sup>a</sup>**.

| Parameter  | Calc  | Exp   |
|------------|-------|-------|
| R(1-19)    | 1.257 | 1.253 |
| R(2-21)    | 1.21  | 1.203 |
| R(3-16)    | 1.359 | 1.362 |
| R(3-21)    | 1.411 | 1.406 |
| R(4-22)    | 1.332 | 1.318 |
| R(4-34)    | 1.458 | 1.466 |
| R(5-7)     | 1.391 | 1.388 |
| R(5-15)    | 1.406 | 1.398 |
| R(7-9)     | 1.397 | 1.39  |
| R(9-11)    | 1.395 | 1.381 |
| R(11-13)   | 1.393 | 1.384 |
| R(13-15)   | 1.405 | 1.398 |
| R(15-16)   | 1.476 | 1.471 |
| R(16-17)   | 1.354 | 1.338 |
| R(17-19)   | 1.45  | 1.445 |
| R(19-20)   | 1.461 | 1.445 |
| R(20-21)   | 1.454 | 1.449 |
| R(20-22)   | 1.419 | 1.428 |
| R(22-23)   | 1.499 | 1.495 |
| R(23-24)   | 1.4   | 1.391 |
| R(23-32)   | 1.399 | 1.387 |
| R(24-26)   | 1.394 | 1.39  |
| R(26-28)   | 1.396 | 1.385 |
| R(28-30)   | 1.395 | 1.383 |
| R(30-32)   | 1.394 | 1.387 |
| R(34-37)   | 1.537 | 1.525 |
| R(37-40)   | 1.537 | 1.524 |
| R(40-43)   | 1.533 | 1.512 |
| A(1-19-17) | 119.7 | 119.6 |
| A(1-19-20) | 123.3 | 123.3 |
| A(2-21-3)  | 114.8 | 114.5 |
| A(2-21-20) | 128.8 | 128.7 |
| A(16-3-21) | 123.9 | 123.2 |
| A(3-16-15) | 112.4 | 112.9 |
| A(3-16-17) | 121.2 | 121.1 |
| A(3-21-20) | 116.4 | 116.8 |
| A(22-4-34) | 127.9 | 126.1 |

|             |       |       |
|-------------|-------|-------|
| A(22-4-47)  | 112   | 115.6 |
| A(4-22-20)  | 119.3 | 120.2 |
| A(4-22-23)  | 117.3 | 116.8 |
| A(34-4-47)  | 120   | 118.1 |
| A(4-34-35)  | 109.1 | 109.3 |
| A(4-34-36)  | 107.4 | 109.3 |
| A(4-34-37)  | 112   | 111.5 |
| A(6-5-7)    | 119.3 | 119.9 |
| A(6-5-15)   | 120.1 | 119.9 |
| A(7-5-15)   | 120.6 | 120.2 |
| A(5-7-8)    | 119.6 | 120   |
| A(5-7-9)    | 120.3 | 120   |
| A(5-15-13)  | 118.8 | 119   |
| A(5-15-16)  | 121.2 | 120.5 |
| A(8-7-9)    | 120.1 | 120   |
| A(7-9-10)   | 120.1 | 119.9 |
| A(7-9-11)   | 119.6 | 120.1 |
| A(10-9-11)  | 120.2 | 120   |
| A(9-11-12)  | 120.1 | 119.9 |
| A(9-11-13)  | 120.3 | 120.1 |
| A(12-11-13) | 119.5 | 119.9 |
| A(11-13-14) | 120.4 | 119.7 |
| A(11-13-15) | 120.4 | 120.5 |
| A(14-13-15) | 119.1 | 119.7 |
| A(13-15-16) | 120   | 120.5 |
| A(15-16-17) | 126.4 | 126   |
| A(16-17-18) | 121.8 | 119.1 |
| A(16-17-19) | 121.4 | 121.8 |
| A(18-17-19) | 116.8 | 119.1 |
| A(17-19-20) | 116.9 | 117   |
| A(19-20-21) | 120.1 | 119.9 |
| A(19-20-22) | 120.3 | 120.4 |
| A(21-20-22) | 119.5 | 119.7 |
| A(20-22-23) | 123.3 | 123   |
| A(22-23-24) | 120.2 | 120.7 |
| A(22-23-32) | 120.1 | 119.4 |
| A(24-23-32) | 119.6 | 119.7 |
| A(23-24-25) | 119.7 | 120.1 |
| A(23-24-26) | 120.1 | 119.9 |
| A(23-32-30) | 120.1 | 120.2 |
| A(23-32-33) | 119.7 | 119.9 |
| A(25-24-26) | 120.2 | 120.1 |
| A(24-26-27) | 119.7 | 120   |
| A(24-26-28) | 120.2 | 120.1 |
| A(27-26-28) | 120.1 | 120   |
| A(26-28-29) | 120.1 | 119.9 |

|             |       |       |
|-------------|-------|-------|
| A(26-28-30) | 119.8 | 120.1 |
| A(29-28-30) | 120.1 | 119.9 |
| A(28-30-31) | 120.1 | 120   |
| A(28-30-32) | 120.2 | 120   |
| A(31-30-32) | 119.7 | 120   |
| A(30-32-33) | 120.2 | 119.9 |
| A(35-34-36) | 107.5 | 108   |
| A(35-34-37) | 111   | 109.3 |
| A(36-34-37) | 109.6 | 109.3 |
| A(34-37-38) | 108.6 | 109   |
| A(34-37-39) | 108.6 | 109   |
| A(34-37-40) | 113.5 | 112.7 |
| A(38-37-39) | 106.5 | 107.8 |
| A(38-37-40) | 109.9 | 109.1 |
| A(39-37-40) | 109.4 | 109   |
| A(37-40-41) | 108.1 | 109   |
| A(37-40-42) | 109.2 | 109   |
| A(37-40-43) | 114.5 | 113.1 |
| A(41-40-42) | 105.9 | 107.8 |
| A(41-40-43) | 109.1 | 109   |
| A(42-40-43) | 109.6 | 109   |
| A(40-43-44) | 112.2 | 109.5 |
| A(40-43-45) | 110.9 | 109.5 |
| A(40-43-46) | 111.1 | 109.5 |
| A(44-43-45) | 107.2 | 109.5 |
| A(44-43-46) | 107.5 | 109.5 |
| A(45-43-46) | 107.7 | 109.5 |

<sup>a</sup>Atom numbering refer to **Fig. 9**



**Table S7** The calculated geometric parameters of **5<sup>a</sup>**.

| Parameter | Calc  | Exp   |
|-----------|-------|-------|
| R(1-19)   | 1.258 | 1.252 |
| R(2-21)   | 1.209 | 1.208 |
| R(3-16)   | 1.359 | 1.357 |
| R(3-21)   | 1.41  | 1.407 |
| R(4-22)   | 1.336 | 1.324 |
| R(4-34)   | 1.452 | 1.467 |
| R(5-7)    | 1.391 | 1.393 |
| R(5-15)   | 1.406 | 1.391 |
| R(7-9)    | 1.397 | 1.38  |
| R(9-11)   | 1.395 | 1.37  |
| R(11-13)  | 1.393 | 1.389 |
| R(13-15)  | 1.405 | 1.393 |
| R(15-16)  | 1.475 | 1.478 |
| R(16-17)  | 1.354 | 1.329 |
| R(17-19)  | 1.448 | 1.444 |
| R(19-20)  | 1.463 | 1.439 |
| R(20-21)  | 1.456 | 1.445 |
| R(20-22)  | 1.416 | 1.429 |
| R(22-23)  | 1.497 | 1.489 |
| R(23-24)  | 1.4   | 1.391 |
| R(23-32)  | 1.399 | 1.389 |
| R(24-26)  | 1.394 | 1.383 |
| R(26-28)  | 1.396 | 1.372 |
| R(28-30)  | 1.395 | 1.376 |
| R(30-32)  | 1.394 | 1.389 |
| R(34-71)  | 1.543 | 1.531 |
| R(38-56)  | 1.258 | 1.252 |
| R(39-58)  | 1.209 | 1.208 |
| R(40-53)  | 1.359 | 1.357 |
| R(40-58)  | 1.41  | 1.407 |
| R(41-59)  | 1.336 | 1.324 |
| R(41-71)  | 1.452 | 1.467 |
| R(42-44)  | 1.391 | 1.393 |
| R(42-52)  | 1.406 | 1.391 |
| R(44-46)  | 1.397 | 1.38  |
| R(46-48)  | 1.395 | 1.37  |
| R(48-50)  | 1.393 | 1.389 |
| R(50-52)  | 1.405 | 1.393 |
| R(52-53)  | 1.475 | 1.478 |
| R(53-54)  | 1.354 | 1.329 |
| R(54-56)  | 1.448 | 1.444 |
| R(56-57)  | 1.463 | 1.439 |
| R(57-58)  | 1.456 | 1.445 |
| R(57-59)  | 1.416 | 1.429 |

|             |       |       |
|-------------|-------|-------|
| R(59-60)    | 1.497 | 1.489 |
| R(60-61)    | 1.4   | 1.391 |
| R(60-69)    | 1.399 | 1.389 |
| R(61-63)    | 1.394 | 1.383 |
| R(63-65)    | 1.396 | 1.372 |
| R(65-67)    | 1.395 | 1.376 |
| R(67-69)    | 1.394 | 1.389 |
| A(1-19-17)  | 119.8 | 119.8 |
| A(1-19-20)  | 123.2 | 123.2 |
| A(2-21-3)   | 114.9 | 114   |
| A(2-21-20)  | 128.7 | 128.9 |
| A(16-3-21)  | 123.9 | 123   |
| A(3-16-15)  | 112.4 | 112.6 |
| A(3-16-17)  | 121.2 | 121   |
| A(3-21-20)  | 116.3 | 117.1 |
| A(22-4-34)  | 127.9 | 126.2 |
| A(22-4-37)  | 111.7 | 115.6 |
| A(4-22-20)  | 119   | 119.9 |
| A(4-22-23)  | 117.5 | 117.5 |
| A(34-4-37)  | 120.2 | 118.1 |
| A(4-34-35)  | 110.2 | 109.3 |
| A(4-34-36)  | 108.8 | 109.3 |
| A(4-34-71)  | 110.7 | 111.7 |
| A(6-5-7)    | 119.3 | 119.8 |
| A(6-5-15)   | 120.2 | 119.8 |
| A(7-5-15)   | 120.5 | 120.3 |
| A(5-7-8)    | 119.6 | 120   |
| A(5-7-9)    | 120.3 | 120   |
| A(5-15-13)  | 118.8 | 118.9 |
| A(5-15-16)  | 121.2 | 120.9 |
| A(8-7-9)    | 120.1 | 120   |
| A(7-9-10)   | 120.1 | 119.9 |
| A(7-9-11)   | 119.6 | 120.1 |
| A(10-9-11)  | 120.2 | 119.9 |
| A(9-11-12)  | 120.1 | 119.8 |
| A(9-11-13)  | 120.3 | 120.5 |
| A(12-11-13) | 119.5 | 119.8 |
| A(11-13-14) | 120.4 | 119.9 |
| A(11-13-15) | 120.4 | 120.2 |
| A(14-13-15) | 119.2 | 119.9 |
| A(13-15-16) | 120   | 120.2 |
| A(15-16-17) | 126.4 | 126.3 |
| A(16-17-18) | 121.7 | 118.9 |
| A(16-17-19) | 121.4 | 122.1 |
| A(18-17-19) | 116.9 | 118.9 |
| A(17-19-20) | 117   | 116.9 |

|             |       |       |
|-------------|-------|-------|
| A(19-20-21) | 120   | 119.7 |
| A(19-20-22) | 120.4 | 121.2 |
| A(21-20-22) | 119.6 | 119.1 |
| A(20-22-23) | 123.5 | 122.6 |
| A(22-23-24) | 120   | 119.9 |
| A(22-23-32) | 120.2 | 120.9 |
| A(24-23-32) | 119.7 | 119.3 |
| A(23-24-25) | 119.8 | 119.8 |
| A(23-24-26) | 120.1 | 120.3 |
| A(23-32-30) | 120   | 119.6 |
| A(23-32-33) | 119.9 | 120.2 |
| A(25-24-26) | 120.2 | 119.8 |
| A(24-26-27) | 119.7 | 119.9 |
| A(24-26-28) | 120.2 | 120.2 |
| A(27-26-28) | 120.2 | 119.9 |
| A(26-28-29) | 120.1 | 120   |
| A(26-28-30) | 119.8 | 120   |
| A(29-28-30) | 120.1 | 120   |
| A(28-30-31) | 120.2 | 119.7 |
| A(28-30-32) | 120.2 | 120.6 |
| A(31-30-32) | 119.6 | 119.7 |
| A(30-32-33) | 120.1 | 120.2 |
| A(35-34-36) | 107.8 | 108   |
| A(35-34-71) | 110.1 | 109.3 |
| A(36-34-71) | 109.3 | 109.3 |
| A(34-71-41) | 110.7 | 111.7 |
| A(34-71-72) | 110.1 | 109.3 |
| A(34-71-73) | 109.3 | 109.3 |
| A(38-56-54) | 119.8 | 119.8 |
| A(38-56-57) | 123.2 | 123.2 |
| A(39-58-40) | 114.9 | 114   |
| A(39-58-57) | 128.7 | 128.9 |
| A(53-40-58) | 123.9 | 123   |
| A(40-53-52) | 112.4 | 112.6 |
| A(40-53-54) | 121.2 | 121   |
| A(40-58-57) | 116.3 | 117.1 |
| A(59-41-71) | 127.9 | 126.2 |
| A(59-41-74) | 111.7 | 115.6 |
| A(41-59-57) | 119   | 119.9 |
| A(41-59-60) | 117.5 | 117.5 |
| A(71-41-74) | 120.2 | 118.1 |
| A(41-71-72) | 110.2 | 109.3 |
| A(41-71-73) | 108.8 | 109.3 |
| A(43-42-44) | 119.3 | 119.8 |
| A(43-42-52) | 120.2 | 119.8 |
| A(44-42-52) | 120.5 | 120.3 |

|             |       |       |
|-------------|-------|-------|
| A(42-44-45) | 119.6 | 120   |
| A(42-44-46) | 120.3 | 120   |
| A(42-52-50) | 118.8 | 118.9 |
| A(42-52-53) | 121.2 | 120.9 |
| A(45-44-46) | 120.1 | 120   |
| A(44-46-47) | 120.1 | 119.9 |
| A(44-46-48) | 119.6 | 120.1 |
| A(47-46-48) | 120.2 | 119.9 |
| A(46-48-49) | 120.1 | 119.8 |
| A(46-48-50) | 120.3 | 120.5 |
| A(49-48-50) | 119.5 | 119.8 |
| A(48-50-51) | 120.4 | 119.9 |
| A(48-50-52) | 120.4 | 120.2 |
| A(51-50-52) | 119.2 | 119.9 |
| A(50-52-53) | 120   | 120.2 |
| A(52-53-54) | 126.4 | 126.3 |
| A(53-54-55) | 121.7 | 118.9 |
| A(53-54-56) | 121.4 | 122.1 |
| A(55-54-56) | 116.9 | 118.9 |
| A(54-56-57) | 117   | 116.9 |
| A(56-57-58) | 120   | 119.7 |
| A(56-57-59) | 120.4 | 121.2 |
| A(58-57-59) | 119.6 | 119.1 |
| A(57-59-60) | 123.5 | 122.6 |
| A(59-60-61) | 120   | 119.9 |
| A(59-60-69) | 120.2 | 120.9 |
| A(61-60-69) | 119.7 | 119.3 |
| A(60-61-62) | 119.8 | 119.8 |
| A(60-61-63) | 120.1 | 120.3 |
| A(60-69-67) | 120   | 119.6 |
| A(60-69-70) | 119.9 | 120.2 |
| A(62-61-63) | 120.2 | 119.8 |
| A(61-63-64) | 119.7 | 119.9 |
| A(61-63-65) | 120.2 | 120.2 |
| A(64-63-65) | 120.2 | 119.9 |
| A(63-65-66) | 120.1 | 120   |
| A(63-65-67) | 119.8 | 120   |
| A(66-65-67) | 120.1 | 120   |
| A(65-67-68) | 120.2 | 119.7 |
| A(65-67-69) | 120.2 | 120.6 |
| A(68-67-69) | 119.6 | 119.7 |
| A(67-69-70) | 120.1 | 120.2 |
| A(72-71-73) | 107.8 | 108   |

<sup>a</sup>Atom numbering refer to **Fig. 9**

**Table S8** The calculated geometric parameters of **6<sup>a</sup>**.

| Parameter  | Calc  | Exp   |
|------------|-------|-------|
| R(1-20)    | 1.315 | 1.32  |
| R(3-22)    | 1.198 | 1.206 |
| R(4-17)    | 1.344 | 1.36  |
| R(4-22)    | 1.432 | 1.401 |
| R(5-23)    | 1.249 | 1.247 |
| R(6-8)     | 1.39  | 1.389 |
| R(6-16)    | 1.403 | 1.394 |
| R(8-10)    | 1.393 | 1.388 |
| R(10-12)   | 1.395 | 1.383 |
| R(12-14)   | 1.388 | 1.39  |
| R(14-16)   | 1.404 | 1.403 |
| R(16-17)   | 1.472 | 1.467 |
| R(17-18)   | 1.36  | 1.345 |
| R(18-20)   | 1.42  | 1.419 |
| R(20-21)   | 1.413 | 1.402 |
| R(21-22)   | 1.449 | 1.444 |
| R(21-23)   | 1.466 | 1.459 |
| R(23-24)   | 1.491 | 1.488 |
| R(24-25)   | 1.401 | 1.4   |
| R(24-33)   | 1.399 | 1.393 |
| R(25-27)   | 1.389 | 1.383 |
| R(27-29)   | 1.394 | 1.384 |
| R(29-31)   | 1.394 | 1.391 |
| R(31-33)   | 1.39  | 1.387 |
| A(2-1-20)  | 105.5 | 109.5 |
| A(1-2-5)   | 150.3 | 146.8 |
| A(1-20-18) | 116.5 | 116.2 |
| A(1-20-21) | 122.3 | 122.3 |
| A(2-5-23)  | 103.9 | 102.3 |
| A(3-22-4)  | 114.7 | 114.3 |
| A(3-22-21) | 130   | 129   |
| A(17-4-22) | 124.4 | 123.6 |
| A(4-17-16) | 113.3 | 112.4 |
| A(4-17-18) | 120.6 | 120.7 |
| A(17-4-7)  | 88.8  | 86.6  |
| A(4-22-21) | 115.3 | 116.7 |
| A(22-4-7)  | 145.1 | 149.8 |
| A(5-23-21) | 119   | 119.3 |
| A(5-23-24) | 116.7 | 116.7 |
| A(7-6-8)   | 120.5 | 119.8 |
| A(7-6-16)  | 119.2 | 119.9 |
| A(6-7-4)   | 97.4  | 100.4 |

|             |       |       |
|-------------|-------|-------|
| A(8-6-16)   | 120.3 | 120.3 |
| A(6-8-9)    | 119.6 | 119.8 |
| A(6-8-10)   | 120.3 | 120.4 |
| A(6-16-14)  | 119   | 119.1 |
| A(6-16-17)  | 119.9 | 120.7 |
| A(9-8-10)   | 120.1 | 119.8 |
| A(8-10-11)  | 120.2 | 120.2 |
| A(8-10-12)  | 119.8 | 119.7 |
| A(11-10-12) | 120.1 | 120.2 |
| A(10-12-13) | 120.1 | 119.7 |
| A(10-12-14) | 120.2 | 120.6 |
| A(13-12-14) | 119.7 | 119.7 |
| A(12-14-15) | 119.2 | 120   |
| A(12-14-16) | 120.4 | 120   |
| A(15-14-16) | 120.3 | 120   |
| A(14-16-17) | 121.2 | 120.2 |
| A(16-17-18) | 126.1 | 126.9 |
| A(17-18-19) | 122.3 | 120.3 |
| A(17-18-20) | 119.4 | 119.3 |
| A(19-18-20) | 118.3 | 120.4 |
| A(18-20-21) | 121.2 | 121.4 |
| A(20-21-22) | 118.5 | 118   |
| A(20-21-23) | 118.1 | 119.1 |
| A(22-21-23) | 123.2 | 122.7 |
| A(21-23-24) | 124.3 | 124   |
| A(23-24-25) | 117.5 | 117.3 |
| A(23-24-33) | 122.9 | 122.8 |
| A(25-24-33) | 119.3 | 119.7 |
| A(24-25-26) | 118.9 | 119.8 |
| A(24-25-27) | 120.4 | 120.3 |
| A(24-33-31) | 120.2 | 119.4 |
| A(24-33-34) | 120.3 | 120.3 |
| A(26-25-27) | 120.7 | 119.8 |
| A(25-27-28) | 119.9 | 120   |
| A(25-27-29) | 119.9 | 119.9 |
| A(28-27-29) | 120.2 | 120.1 |
| A(27-29-30) | 120.1 | 120.1 |
| A(27-29-31) | 119.9 | 119.8 |
| A(30-29-31) | 120   | 120.1 |
| A(29-31-32) | 120.1 | 119.6 |
| A(29-31-33) | 120.2 | 120.8 |
| A(32-31-33) | 119.7 | 119.6 |
| A(31-33-34) | 119.5 | 120.3 |

<sup>a</sup>Atom numbering refer to **Fig. 9**

**Table S9** Natural charges (NC) at the different atomic sites in the studied molecules<sup>a</sup>.

| Atom | NC      |
|------|---------|------|---------|------|---------|------|---------|------|---------|------|---------|
| 1    |         | 2    |         | 3    |         | 4    |         | 5    |         | 6    |         |
| O1   | -0.5242 | O1   | -0.6413 | O1   | -0.5250 | O1   | -0.6479 | O1   | -0.6465 | O1   | -0.6328 |
| O2   | -0.5773 | O2   | -0.5803 | O2   | -0.5821 | O2   | -0.5815 | O2   | -0.5770 | H2   | 0.4938  |
| O3   | -0.6433 | N3   | -0.7580 | O3   | -0.6487 | O3   | -0.5249 | O3   | -0.5238 | O3   | -0.5632 |
| O4   | -0.5169 | O4   | -0.5247 | N4   | -0.5493 | N4   | -0.5496 | N4   | -0.5636 | O4   | -0.5303 |
| N5   | -0.5486 | C5   | -0.2009 | H5   | 0.4650  | C5   | -0.2025 | C5   | -0.2017 | O5   | -0.6296 |
| H6   | 0.4726  | H6   | 0.2632  | C6   | -0.2030 | H6   | 0.2405  | H6   | 0.2408  | C6   | -0.1574 |
| C7   | -0.2030 | C7   | -0.2345 | H7   | 0.2406  | C7   | -0.2370 | C7   | -0.2366 | H7   | 0.2268  |
| H8   | 0.2416  | H8   | 0.2445  | C8   | -0.2371 | H8   | 0.2432  | H8   | 0.2441  | C8   | -0.1916 |
| C9   | -0.2367 | C9   | -0.2226 | H9   | 0.2431  | C9   | -0.2236 | C9   | -0.2217 | H9   | 0.2074  |
| H10  | 0.2436  | H10  | 0.2424  | C10  | -0.2240 | H10  | 0.2419  | H10  | 0.2427  | C10  | -0.1743 |
| C11  | -0.2230 | C11  | -0.2366 | H11  | 0.2417  | C11  | -0.2347 | C11  | -0.2344 | H11  | 0.2051  |
| H12  | 0.2422  | H12  | 0.2438  | C12  | -0.2347 | H12  | 0.2440  | H12  | 0.2448  | C12  | -0.1940 |
| C13  | -0.2346 | C13  | -0.2026 | H13  | 0.2439  | C13  | -0.2016 | C13  | -0.2004 | H13  | 0.2065  |
| H14  | 0.2444  | H14  | 0.2415  | C14  | -0.2017 | H14  | 0.2636  | H14  | 0.2637  | C14  | -0.1642 |
| C15  | -0.2009 | C15  | -0.1040 | H15  | 0.2634  | C15  | -0.1032 | C15  | -0.1050 | H15  | 0.2042  |
| H16  | 0.2632  | C16  | 0.3867  | C16  | -0.1028 | C16  | 0.3865  | C16  | 0.3900  | C16  | -0.1083 |
| C17  | -0.1038 | C17  | -0.3731 | C17  | 0.3861  | C17  | -0.3712 | C17  | -0.3730 | C17  | 0.4327  |
| C18  | 0.3883  | H18  | 0.2571  | C18  | -0.3713 | H18  | 0.2552  | H18  | 0.2568  | C18  | -0.3532 |
| C19  | 0.7922  | C19  | 0.4914  | H19  | 0.2551  | C19  | 0.4869  | C19  | 0.4882  | H19  | 0.2324  |
| C20  | -0.3503 | C20  | -0.3618 | C20  | 0.4863  | C20  | -0.3579 | C20  | -0.3546 | C20  | 0.4787  |
| C21  | 0.4854  | C21  | 0.7948  | C21  | -0.3581 | C21  | 0.7934  | C21  | 0.7954  | C21  | -0.3808 |
| C22  | -0.3731 | C22  | 0.3436  | C22  | 0.7929  | C22  | 0.3496  | C22  | 0.3514  | C22  | 0.7901  |
| H23  | 0.2572  | C23  | -0.0896 | C23  | 0.3525  | C23  | -0.0877 | C23  | -0.0935 | C23  | 0.5637  |
| C24  | 0.3468  | C24  | -0.2260 | C24  | -0.0876 | C24  | -0.2127 | C24  | -0.2131 | C24  | -0.1223 |
| C25  | -0.0921 | H25  | 0.2460  | C25  | -0.2122 | H25  | 0.2468  | H25  | 0.2474  | C25  | -0.1521 |
| C26  | -0.2039 | C26  | -0.2337 | H26  | 0.2456  | C26  | -0.2272 | C26  | -0.2267 | H26  | 0.2158  |
| H27  | 0.2486  | H27  | 0.2445  | C27  | -0.2273 | H27  | 0.2436  | H27  | 0.2452  | C27  | -0.2019 |
| C28  | -0.2309 | C28  | -0.2226 | H28  | 0.2432  | C28  | -0.2332 | C28  | -0.2322 | H28  | 0.2034  |
| H29  | 0.2439  | H29  | 0.2435  | C29  | -0.2338 | H29  | 0.2422  | H29  | 0.2434  | C29  | -0.1740 |
| C30  | -0.2288 | C30  | -0.2305 | H30  | 0.2419  | C30  | -0.2269 | C30  | -0.2275 | H30  | 0.2015  |
| H31  | 0.2417  | H31  | 0.2459  | C31  | -0.2270 | H31  | 0.2433  | H31  | 0.2433  | C31  | -0.1995 |
| C32  | -0.2296 | C32  | -0.1836 | H32  | 0.2432  | C32  | -0.2126 | C32  | -0.2083 | H32  | 0.2039  |
| H33  | 0.2435  | H33  | 0.2522  | C33  | -0.2114 | H33  | 0.2455  | H33  | 0.2479  | C33  | -0.1469 |
| C34  | -0.2053 | H34  | 0.4231  | H34  | 0.2458  | C34  | -0.2713 | C34  | -0.2778 | H34  | 0.2103  |
| H35  | 0.2479  | H35  | 0.4620  | C35  | -0.0649 | H35  | 0.2491  | H35  | 0.2565  |      |         |
| C36  | 0.1107  |      |         | H36  | 0.2554  | H36  | 0.2407  | H36  | 0.2483  |      |         |
| C37  | -0.2230 |      |         | C37  | -0.4733 | C37  | -0.4726 | H37  | 0.4674  |      |         |
| H38  | 0.2549  |      |         | H38  | 0.2485  | H38  | 0.2361  | O38  | -0.6465 |      |         |
| C39  | -0.3132 |      |         | H39  | 0.2369  | H39  | 0.2443  | O39  | -0.5770 |      |         |
| H40  | 0.2458  |      |         | C40  | -0.4677 | C40  | -0.4667 | O40  | -0.5238 |      |         |
| C41  | 0.3203  |      |         | H41  | 0.2481  | H41  | 0.2436  | N41  | -0.5636 |      |         |

|     |         |     |         |     |         |     |         |
|-----|---------|-----|---------|-----|---------|-----|---------|
| C42 | -0.3290 | H42 | 0.2315  | H42 | 0.2319  | C42 | -0.2017 |
| H43 | 0.2070  | C43 | -0.4680 | C43 | -0.6919 | H43 | 0.2408  |
| H44 | 0.2342  | H44 | 0.2451  | H44 | 0.2280  | C44 | -0.2366 |
| H45 | 0.2071  | H45 | 0.2310  | H45 | 0.2399  | H45 | 0.2441  |
| C46 | -0.2677 | C46 | -0.4676 | H46 | 0.2316  | C46 | -0.2217 |
| H47 | 0.2549  | H47 | 0.2314  | H47 | 0.4671  | H47 | 0.2427  |
| C48 | -0.2298 | H48 | 0.2481  |     |         | C48 | -0.2344 |
| H49 | 0.2508  | C49 | -0.4733 |     |         | H49 | 0.2448  |
|     |         | H50 | 0.2369  |     |         | C50 | -0.2004 |
|     |         | H51 | 0.2485  |     |         | H51 | 0.2637  |
|     |         |     |         |     |         | C52 | -0.1050 |
|     |         |     |         |     |         | C53 | 0.3900  |
|     |         |     |         |     |         | C54 | -0.3730 |
|     |         |     |         |     |         | H55 | 0.2568  |
|     |         |     |         |     |         | C56 | 0.4882  |
|     |         |     |         |     |         | C57 | -0.3546 |
|     |         |     |         |     |         | C58 | 0.7954  |
|     |         |     |         |     |         | C59 | 0.3514  |
|     |         |     |         |     |         | C60 | -0.0935 |
|     |         |     |         |     |         | C61 | -0.2131 |
|     |         |     |         |     |         | H62 | 0.2474  |
|     |         |     |         |     |         | C63 | -0.2267 |
|     |         |     |         |     |         | H64 | 0.2452  |
|     |         |     |         |     |         | C65 | -0.2322 |
|     |         |     |         |     |         | H66 | 0.2434  |
|     |         |     |         |     |         | C67 | -0.2275 |
|     |         |     |         |     |         | H68 | 0.2433  |
|     |         |     |         |     |         | C69 | -0.2083 |
|     |         |     |         |     |         | H70 | 0.2479  |
|     |         |     |         |     |         | C71 | -0.2778 |
|     |         |     |         |     |         | H72 | 0.2565  |
|     |         |     |         |     |         | H73 | 0.2483  |
|     |         |     |         |     |         | H74 | 0.4674  |

<sup>a</sup>Atom numbering refer to **Fig. 9**



**Table S10** The calculated and experimental NMR chemical shifts of **1<sup>a</sup>**.

| Atom |    | Calc.   | Exp.   | Atom |    | Calc.  | Exp.  |
|------|----|---------|--------|------|----|--------|-------|
| C    | 7  | 114.215 | 127.12 | H    | 6  | 15.657 | 15.43 |
| C    | 9  | 116.623 | 129.5  | H    | 8  | 8.231  | 7.93  |
| C    | 11 | 119.272 | 128.55 | H    | 10 | 7.934  | 7.55  |
| C    | 13 | 116.68  | 129.5  | H    | 12 | 7.95   | 7.55  |
| C    | 15 | 114.631 | 127.12 | H    | 14 | 7.92   | 7.55  |
| C    | 17 | 119.766 | 129.88 | H    | 16 | 8.358  | 7.93  |
| C    | 18 | 151.174 | 172.86 | H    | 23 | 6.668  | 6.79  |
| C    | 19 | 148.81  | 160.57 | H    | 27 | 7.981  | 7.36  |
| C    | 20 | 91.754  | 97.53  | H    | 29 | 7.955  | 7.31  |
| C    | 21 | 170.596 | 184.49 | H    | 31 | 7.903  | 7.31  |
| C    | 22 | 94.268  | 104.59 | H    | 33 | 7.773  | 7.31  |
| C    | 24 | 159.015 | 158.36 | H    | 35 | 7.464  | 7.36  |
| C    | 25 | 122.989 | 131.98 | H    | 38 | 6.734  | 6.94  |
| C    | 26 | 117.932 | 128.24 | H    | 40 | 6.721  | 6.79  |
| C    | 28 | 116.398 | 129.55 | H    | 43 | 3.777  | 3.69  |
| C    | 30 | 117.306 | 131.22 | H    | 44 | 4.191  | 3.69  |
| C    | 32 | 116.38  | 129.55 | H    | 45 | 3.821  | 3.69  |
| C    | 34 | 114.679 | 128.24 | H    | 47 | 7.189  | 6.79  |
| C    | 36 | 117.796 | 129.56 | H    | 49 | 7.535  | 6.94  |
| C    | 37 | 115.023 | 126.35 |      |    |        |       |
| C    | 39 | 98.26   | 114.53 |      |    |        |       |
| C    | 41 | 144.671 | 133.4  |      |    |        |       |
| C    | 42 | 45.758  | 55.75  |      |    |        |       |
| C    | 46 | 105.506 | 114.53 |      |    |        |       |
| C    | 48 | 113.663 | 126.35 |      |    |        |       |

<sup>a</sup>Atom numbering refer to **Fig. 9**

**Table S11** The calculated and experimental NMR chemical shifts of **2<sup>a</sup>**.

| Atom | Calc.   | Exp.   | Atom | Calc.  | Exp.  |
|------|---------|--------|------|--------|-------|
| C 5  | 114.666 | 126.21 | H 6  | 8.368  | 7.98  |
| C 7  | 116.649 | 128.47 | H 8  | 7.913  | 7.48  |
| C 9  | 119.281 | 130.49 | H 10 | 7.94   | 7.48  |
| C 11 | 116.561 | 128.47 | H 12 | 7.935  | 7.48  |
| C 13 | 114.169 | 126.21 | H 14 | 8.228  | 7.89  |
| C 15 | 119.928 | 131.47 | H 18 | 6.612  | 6.61  |
| C 16 | 151.185 | 175.72 | H 25 | 7.863  | 7.55  |
| C 17 | 94.561  | 105.17 | H 27 | 7.998  | 7.44  |
| C 19 | 170.563 | 183.9  | H 29 | 8.004  | 7.44  |
| C 20 | 90.233  | 95.8   | H 31 | 7.849  | 7.44  |
| C 21 | 149.468 | 162.14 | H 33 | 7.885  | 7.55  |
| C 22 | 162.827 | 159.85 | H 34 | 5.995  | 10    |
| C 23 | 126.34  | 136.7  | H 35 | 12.928 | 12.25 |
| C 24 | 113.911 | 127.76 |      |        |       |
| C 26 | 116.794 | 129.49 |      |        |       |
| C 28 | 118.679 | 131.71 |      |        |       |
| C 30 | 115.488 | 129.49 |      |        |       |
| C 32 | 117.007 | 127.76 |      |        |       |

<sup>a</sup>Atom numbering refer to **Fig. 9**

**Table S12** The calculated and experimental NMR chemical shifts of **3<sup>a</sup>**.

| Atom | Calc.   | Exp.   | Atom | Calc.  | Exp.  |
|------|---------|--------|------|--------|-------|
| C 6  | 113.851 | 126.21 | H 5  | 14.195 | 14.17 |
| C 8  | 116.538 | 129.49 | H 7  | 8.178  | 7.86  |
| C 10 | 118.974 | 129.61 | H 9  | 7.895  | 7.51  |
| C 12 | 116.583 | 129.49 | H 11 | 7.906  | 7.35  |
| C 14 | 114.391 | 126.21 | H 13 | 7.881  | 7.51  |
| C 16 | 119.967 | 131.38 | H 15 | 8.293  | 7.86  |
| C 17 | 150.761 | 173.37 | H 19 | 6.583  | 6.63  |
| C 18 | 94.564  | 104.77 | H 26 | 7.678  | 7.54  |
| C 20 | 170.361 | 184.32 | H 28 | 7.981  | 7.51  |
| C 21 | 90.949  | 96.34  | H 30 | 7.958  | 7.37  |
| C 22 | 148.953 | 161.39 | H 32 | 7.972  | 7.51  |
| C 23 | 161.762 | 160.14 | H 34 | 7.652  | 7.54  |
| C 24 | 124.843 | 133.69 | H 36 | 3.174  | 3.17  |
| C 25 | 113.4   | 128.96 | H 38 | 1.974  | 1.64  |
| C 27 | 116.331 | 126.44 | H 39 | 1.669  | 1.73  |
| C 29 | 116.104 | 131.76 | H 41 | 1.857  | 1.45  |
| C 31 | 116.339 | 126.44 | H 42 | 1.361  | 1.11  |
| C 33 | 113.322 | 128.96 | H 44 | 1.671  | 1.11  |
| C 35 | 47.85   | 53.67  | H 45 | 1.484  | 1.45  |
| C 37 | 27.014  | 32.7   | H 47 | 1.376  | 1.45  |
| C 40 | 19.054  | 24.89  | H 48 | 1.864  | 1.26  |
| C 43 | 19.117  | 23.72  | H 50 | 1.681  | 1.73  |
| C 46 | 19.045  | 23.72  | H 51 | 2      | 1.64  |
| C 49 | 27      | 32.7   |      |        |       |

<sup>a</sup>Atom numbering refer to **Fig. 9**

**Table S13** The calculated and experimental NMR chemical shifts of **4<sup>a</sup>**.

| Atom | Calc.   | Exp.   | Atom | Calc.  | Exp.  |
|------|---------|--------|------|--------|-------|
| C 5  | 113.498 | 125.82 | H 6  | 8.157  | 7.82  |
| C 7  | 116.131 | 128.79 | H 8  | 7.826  | 7.44  |
| C 9  | 118.576 | 129.45 | H 10 | 7.825  | 7.44  |
| C 11 | 116.472 | 128.79 | H 12 | 7.836  | 7.44  |
| C 13 | 114.677 | 125.82 | H 14 | 8.378  | 7.82  |
| C 15 | 119.99  | 131.36 | H 18 | 6.579  | 6.45  |
| C 16 | 150.475 | 174.94 | H 25 | 7.586  | 7.52  |
| C 17 | 94.205  | 104.44 | H 27 | 7.935  | 7.26  |
| C 19 | 170.391 | 185.05 | H 29 | 7.892  | 7.52  |
| C 20 | 91.372  | 96.8   | H 31 | 7.935  | 7.26  |
| C 21 | 148.089 | 162.12 | H 33 | 7.628  | 7.52  |
| C 22 | 162.726 | 160.94 | H 35 | 3.35   | 3.2   |
| C 23 | 124.188 | 133.43 | H 36 | 3.018  | 3.2   |
| C 24 | 113.652 | 126.01 | H 38 | 1.576  | 1.59  |
| C 26 | 116.237 | 128.88 | H 39 | 1.942  | 1.59  |
| C 28 | 116.009 | 131.12 | H 41 | 1.725  | 1.37  |
| C 30 | 116.225 | 128.88 | H 42 | 1.516  | 1.37  |
| C 32 | 113.223 | 126.01 | H 44 | 0.739  | 0.9   |
| C 34 | 36.935  | 45.19  | H 45 | 1.039  | 0.9   |
| C 37 | 26.495  | 31.77  | H 46 | 0.561  | 0.9   |
| C 40 | 15.306  | 20     | H 47 | 14.346 | 14.12 |
| C 43 | 5.675   | 13.57  |      |        |       |

<sup>a</sup>Atom numbering refer to **Fig. 9**

**Table S14** The calculated and experimental NMR chemical shifts of **5**<sup>a</sup>.

| Atom | Calc.   | Exp.   | Atom | Calc.  | Exp.  |
|------|---------|--------|------|--------|-------|
| C 5  | 113.693 | 125.8  | H 6  | 8.1    | 7.82  |
| C 7  | 116.178 | 126.12 | H 8  | 7.822  | 7.47  |
| C 9  | 118.779 | 129.75 | H 10 | 7.852  | 7.47  |
| C 11 | 116.504 | 126.12 | H 12 | 7.833  | 7.47  |
| C 13 | 114.839 | 125.8  | H 14 | 8.338  | 7.82  |
| C 15 | 119.466 | 131.39 | H 18 | 6.528  | 6.49  |
| C 16 | 150.821 | 176.03 | H 25 | 7.525  | 7.07  |
| C 17 | 93.766  | 104.23 | H 27 | 7.932  | 7.47  |
| C 19 | 170.544 | 185.33 | H 29 | 7.957  | 7.47  |
| C 20 | 91.778  | 97.64  | H 31 | 7.91   | 7.47  |
| C 21 | 147.745 | 161.57 | H 33 | 7.04   | 7.07  |
| C 22 | 163.292 | 161.52 | H 35 | 3.068  | 3.39  |
| C 23 | 123.178 | 132.6  | H 36 | 3.36   | 3.39  |
| C 24 | 113.633 | 129.75 | H 37 | 14.313 | 14.34 |
| C 26 | 116.285 | 128.85 | H 43 | 8.1    | 7.82  |
| C 28 | 116.332 | 131.14 | H 45 | 7.822  | 7.47  |
| C 30 | 116.776 | 128.85 | H 47 | 7.852  | 7.47  |
| C 32 | 113.397 | 129.75 | H 49 | 7.833  | 7.47  |
| C 34 | 37.035  | 44.65  | H 51 | 8.338  | 7.82  |
| C 42 | 113.693 | 125.8  | H 55 | 6.528  | 6.49  |
| C 44 | 116.178 | 126.12 | H 62 | 7.525  | 7.07  |
| C 46 | 118.779 | 129.75 | H 64 | 7.932  | 7.47  |
| C 48 | 116.504 | 126.12 | H 66 | 7.957  | 7.47  |
| C 50 | 114.839 | 125.8  | H 68 | 7.91   | 7.47  |
| C 52 | 119.466 | 131.39 | H 70 | 7.04   | 7.07  |
| C 53 | 150.821 | 176.03 | H 72 | 3.068  | 3.39  |
| C 54 | 93.766  | 104.23 | H 73 | 3.36   | 3.39  |
| C 56 | 170.544 | 185.33 | H 74 | 14.313 | 14.34 |
| C 57 | 91.778  | 97.64  |      |        |       |
| C 58 | 147.745 | 161.57 |      |        |       |
| C 59 | 163.292 | 161.52 |      |        |       |
| C 60 | 123.178 | 132.6  |      |        |       |
| C 61 | 113.633 | 129.75 |      |        |       |
| C 63 | 116.285 | 128.85 |      |        |       |
| C 65 | 116.332 | 131.14 |      |        |       |
| C 67 | 116.776 | 128.85 |      |        |       |
| C 69 | 113.397 | 129.75 |      |        |       |
| C 71 | 37.035  | 44.65  |      |        |       |

<sup>a</sup>Atom numbering refer to **Fig. 9**

**Table S15** The calculated and experimental NMR chemical shifts of **6**<sup>a</sup>.

| Atom | Calc.   | Exp.   | Atom | Calc.  | Exp. |
|------|---------|--------|------|--------|------|
| C 6  | 115.825 | 126.03 | H 2  | 16.931 | -    |
| C 8  | 117.07  | 129.05 | H 7  | 8.525  | 7.92 |
| C 10 | 121.279 | 130.97 | H 9  | 7.987  | 7.63 |
| C 12 | 116.993 | 129.05 | H 11 | 8.047  | 7.53 |
| C 14 | 115.24  | 126.03 | H 13 | 7.997  | 7.63 |
| C 16 | 118.656 | 132.22 | H 15 | 8.322  | 7.92 |
| C 17 | 156.712 | 161.22 | H 19 | 6.914  | 6.92 |
| C 18 | 87.52   | 102.58 | H 26 | 8.163  | 7.89 |
| C 20 | 167.603 | 170.91 | H 28 | 7.96   | 7.53 |
| C 21 | 91.641  | 98.47  | H 30 | 8.008  | 7.66 |
| C 22 | 147.438 | 161.83 | H 32 | 7.787  | 7.53 |
| C 23 | 187.808 | 193.4  | H 34 | 8.1    | 7.89 |
| C 24 | 127.118 | 137.72 |      |        |      |
| C 25 | 117.171 | 129.34 |      |        |      |
| C 27 | 115.759 | 129.76 |      |        |      |
| C 29 | 120.149 | 133.76 |      |        |      |
| C 31 | 114.296 | 129.76 |      |        |      |
| C 33 | 117.863 | 129.34 |      |        |      |

<sup>a</sup>Atom numbering refer to **Fig. 9**

**Table S16** Calculated energies and thermodynamic parameters for the suggested isomers of the studied pyran-2,4-dione<sup>a</sup>.

| Parameter        | 1(A)       | 1(B)       | 2(A)       | 2(B)       | 3(A)       | 3(B)       | 5 <sup>b</sup> | 6(A)      | 6(B)      |
|------------------|------------|------------|------------|------------|------------|------------|----------------|-----------|-----------|
| E                | -2025.8269 | -2025.8129 | -1319.7818 | -1319.7760 | -1208.8964 | -1208.8883 | -1131.4663     | -994.3045 | -994.0749 |
| ZPVE             | 0.5752     | 0.5711     | 0.3821     | 0.3804     | 0.4200     | 0.4175     | 0.3829         | 0.2555    | 0.2565    |
| E <sub>tot</sub> | -2025.2517 | -2025.2418 | -1319.3997 | -1319.3956 | -1208.4764 | -1208.4708 | -1131.0835     | -994.0489 | -993.8184 |
| ΔE               | -6.2317    |            | -2.5890    |            | -3.5193    |            | -0.0006        | -144.6943 |           |
| H                | -2025.2134 | -2025.2035 | -1319.3740 | -1319.3699 | -1208.4519 | -1208.4463 | -1131.0593     | -994.0309 | -993.8004 |
| ΔG               | -2025.3291 | -2025.3188 | -1319.4577 | -1319.4531 | -1208.5337 | -1208.5290 | -1131.1402     | -994.0960 | -993.8652 |
| G                | -6.4307    |            | -2.8583    |            | -2.9568    |            | -0.0144        | -144.8091 |           |
| S                | 243.5410   | 242.6320   | 176.1590   | 175.1160   | 172.2040   | 174.0650   | 170.2430       | 137.0620  | 136.5440  |

<sup>a</sup> All values in A.U except ΔE and ΔG are in kcal/mole while S in Cal/Mol.K

<sup>b</sup> Geometry optimization of **5(B)** returned to the same optimized structure of **5(A)**
